# Supplementary material for: Improving diagnosis of inherited peripheral neuropathies through gene panel analysis
Source: PubMed Central journal article supplement (PMC4994270; doi:10.1186/s13023-016-0500-5), 2016-08-22
Supplement: 13023_2016_500_MOESM1_ESM.pdf [file 13023_2016_500_MOESM1_ESM.pdf]

## SUPPLEMENTARY FILE PART 1:

In the study cohort, 47% of patients were referred as HMSN II, 30% of patients as HMSN I, 4% as having intermediate HMSN and the remaining 19% of patients was not classified.

Most patients were sporadic cases, autosomal dominant inheritance was described for 29% of patients and autosomal recessive inheritance for 7% of patients in the study cohort.

Figure A represents genes, that were tested previously Sanger sequenced in patients included in the study with no causal mutations found.

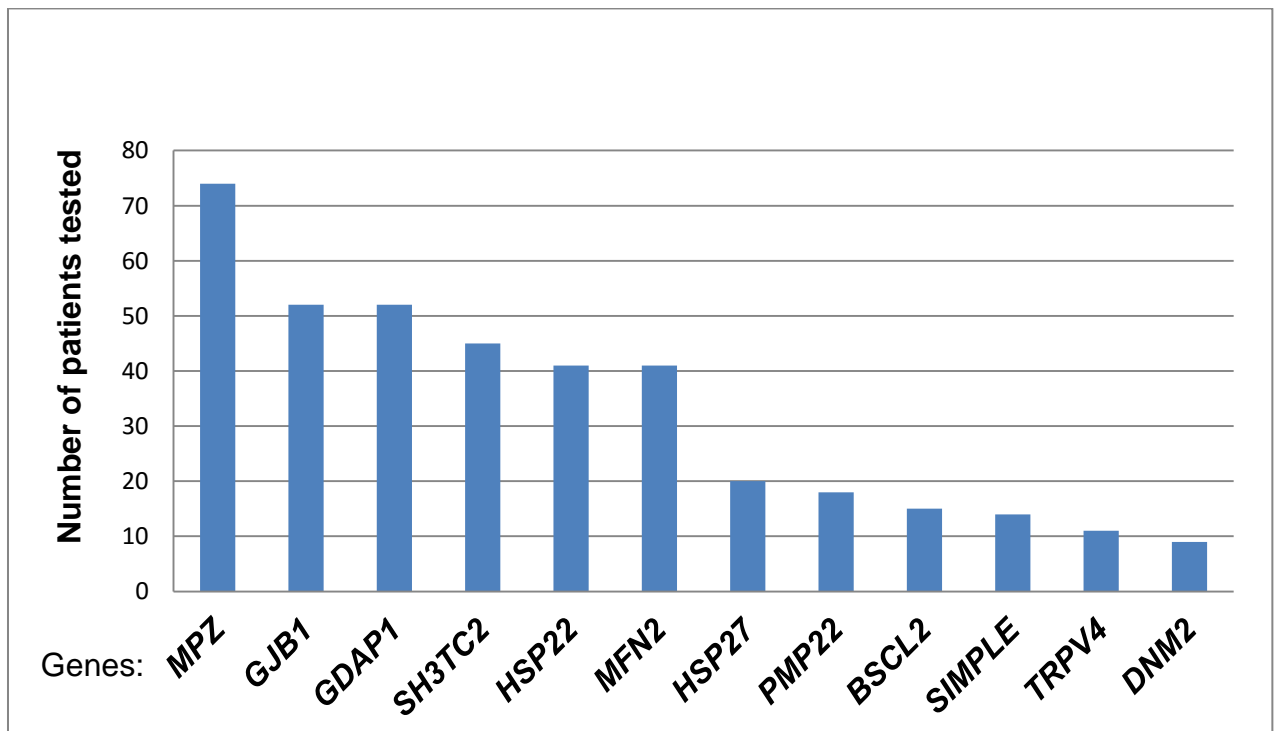

**FIGURE A: GENES TESTED PRIOR TO THIS STUDY** with Sanger sequencing

Legend: X – axis: genes; Y – axis: number of patients from the study cohort (total number of patients 153) tested for mutations in these genes.

**SUPPLEMENTARY FILE PART 2:** A list of genes included in consecutive designs

| Design 06/2013 | Design 10/2013 | Design 05/2014 | Design 10/2014 | Design 08/2015 | Design 06/2013 | Design 10/2013 | Design 05/2014 | Design 10/2014 | Design 08/2015 |
|----------------|----------------|----------------|----------------|----------------|----------------|----------------|----------------|----------------|----------------|
| 59 genes       | 64 genes       | 72 genes       | 78 genes       | 93 genes       | 59 genes       | 64 genes       | 72 genes       | 78 genes       | 93 genes       |
| AARS           | AARS           | AARS           | AARS           | AARS           | LITAF          | LITAF          | LITAF          | LITAF          | LITAF          |
|                | AIFM1          |                |                | AIFM1          | LMNA           | LMNA           | LMNA           | LMNA           | LMNA           |
| ARHGE          | ARHGE          | ARHGE          | ARHGE          | ARHGE          | LRSAM          | LRSAM          | LRSAM          | LRSAM          | LRSAM          |
| ATL1           | ATL1           | ATL1           | ATL1           | ATL1           |                | MARS           | MARS           | MARS           | MARS           |
|                |                | ATP7A          | ATP7A          | ATP7A          | MED25          | MED25          | MED25          | MED25          | MED25          |
|                |                | BICD2          | BICD2          | BICD2          | MFN2           | MFN2           | MFN2           | MFN2           | MFN2           |
| BSCL2          | BSCL2          | BSCL2          | BSCL2          | BSCL2          | MICAL1         | MICAL1         | MICAL1         | MICAL1         | MICAL1         |
| CCT5           | CCT5           | CCT5           | CCT5           | CCT5           | MPZ            | MPZ            | MPZ            | MPZ            | MPZ            |
|                |                |                |                | CHCH           |                |                |                |                | MT-            |
|                |                |                | COX6A          | COX6A          | MTMR2          | MTMR2          | MTMR2          | MTMR2          | MTMR2          |
| CTDP1          | CTDP1          | CTDP1          | CTDP1          | CTDP1          |                |                | MYH14          | MYH14          | MYH14          |
| DCTN1          | DCTN1          | DCTN1          | DCTN1          | DCTN1          | NDRG1          | NDRG1          | NDRG1          | NDRG1          | NDRG1          |
|                |                | DNAJB          | DHTKD          | DHTKD          | NEFL           | NEFL           | NEFL           | NEFL           | NEFL           |
|                |                |                | DNAJB          | DNAJB          | NGF            | NGF            | NGF            | NGF            | NGF            |
| DNM2           | DNM2           | DNM2           | DNM2           | DNM2           | NTRK1          | NTRK1          | NTRK1          | NTRK1          | NTRK1          |
|                |                | DNMT1          | DNMT1          | DNMT1          |                | PDK3           | PDK3           | PDK3           | PDK3           |
|                |                |                |                | DRP2           | PLEKH          | PLEKH          | PLEKH          | PLEKH          | PLEKH          |
|                |                |                |                | DST            | PMP22          | PMP22          | PMP22          | PMP22          | PMP22          |
|                |                | DYNC1          | DYNC1          | DYNC1          | PRPS1          | PRPS1          | PRPS1          | PRPS1          | PRPS1          |
| EGR2           | EGR2           | EGR2           | EGR2           | EGR2           | PRX            | PRX            | PRX            | PRX            | PRX            |
| FAM13          | FAM13          | FAM13          | FAM13          | FAM13          | RAB7A          | RAB7A          | RAB7A          | RAB7A          | RAB7A          |
| FBLN5          | FBLN5          | FBLN5          | FBLN5          | FBLN5          | REEP1          | REEP1          | REEP1          | REEP1          | REEP1          |
|                |                |                |                | FBXO3          |                |                |                | SBF1           | SBF1           |
| FGD4           | FGD4           | FGD4           | FGD4           | FGD4           | SBF2           | SBF2           | SBF2           | SBF2           | SBF2           |
| FIG4           | FIG4           | FIG4           | FIG4           | FIG4           |                |                |                |                | SCN11          |
| GAN            | GAN            | GAN            | GAN            | GAN            |                |                |                |                | SCN9A          |
| GARS           | GARS           | GARS           | GARS           | GARS           | SEPT09         | SEPT09         | SEPT09         | SEPT09         | SEPT09         |
| GDAP1          | GDAP1          | GDAP1          | GDAP1          | GDAP1          | SETX           | SETX           | SETX           | SETX           | SETX           |
| GJB1           | GJB1           | GJB1           | GJB1           | GJB1           |                |                |                | SH3BP          | SH3BP          |
|                |                |                |                | GJB3           | SH3TC          | SH3TC          | SH3TC          | SH3TC          | SH3TC          |
|                |                |                | GNB4           | GNB4           |                |                |                |                | SIGMA          |
| HARS           | HARS           | HARS           | HARS           | HARS           | SLC12A         | SLC12A         | SLC12A         | SLC12A         | SLC12A         |
| HINT1          | HINT1          | HINT1          | HINT1          | HINT1          | SLC18A         | SLC18A         | SLC18A         | SLC18A         | SLC18A         |
|                | HK1            | HK1            | HK1            | HK1            | SLC5A7         | SLC5A7         | SLC5A7         | SLC5A7         | SLC5A7         |
| HSPB1          | HSPB1          | HSPB1          | HSPB1          | HSPB1          |                |                |                |                | SOD1           |
| HSPB3          | HSPB3          | HSPB3          | HSPB3          | HSPB3          | SOX10          | SOX10          | SOX10          | SOX10          | SOX10          |
| HSPB8          | HSPB8          | HSPB8          | HSPB8          | HSPB8          | SPTLC          | SPTLC          | SPTLC          | SPTLC          | SPTLC          |
|                |                |                |                | IFRD1          | SPTLC          | SPTLC          | SPTLC          | SPTLC          | SPTLC          |
| IGHMB          | IGHMB          | IGHMB          | IGHMB          | IGHMB          |                | SURF1          |                |                | SURF1          |
| IKBKA          | IKBKA          | IKBKA          | IKBKA          | IKBKA          | TFG            | TFG            | TFG            | TFG            | TFG            |
| INF2           | INF2           | INF2           | INF2           | INF2           |                |                |                | TRIM1          | TRIM2          |
|                |                |                | ITPR3          | ITPR3          | TRPV4          | TRPV4          | TRPV4          | TRPV4          | TRPV4          |
| KARS           | KARS           | KARS           | KARS           | KARS           |                |                |                |                | TUBB3          |
|                |                | KIF1A          | KIF1A          | KIF1A          |                |                |                |                | VAPB           |
| KIF1B          | KIF1B          | KIF1B          | KIF1B          | KIF1B          |                |                |                | VCP            | VCP            |
|                |                |                | KLHL1          | KLHL1          | WNK1           | WNK1           | WNK1           | WNK1           | WNK1           |
|                |                |                |                |                | YARS           | YARS           | YARS           | YARS           | YARS           |

### SUPPLEMENTARY FILE PART 3: Galaxy pipeline parameters and pipeline resources

#### THE SCHEMATIC REPRESENTATION OF THE GALAXY PIPELINE

Legend: ROD file – regions of interest file; DOC – Depth of coverage, filter 8% - all variants that are present in population with frequency 8% and more were filtered out.

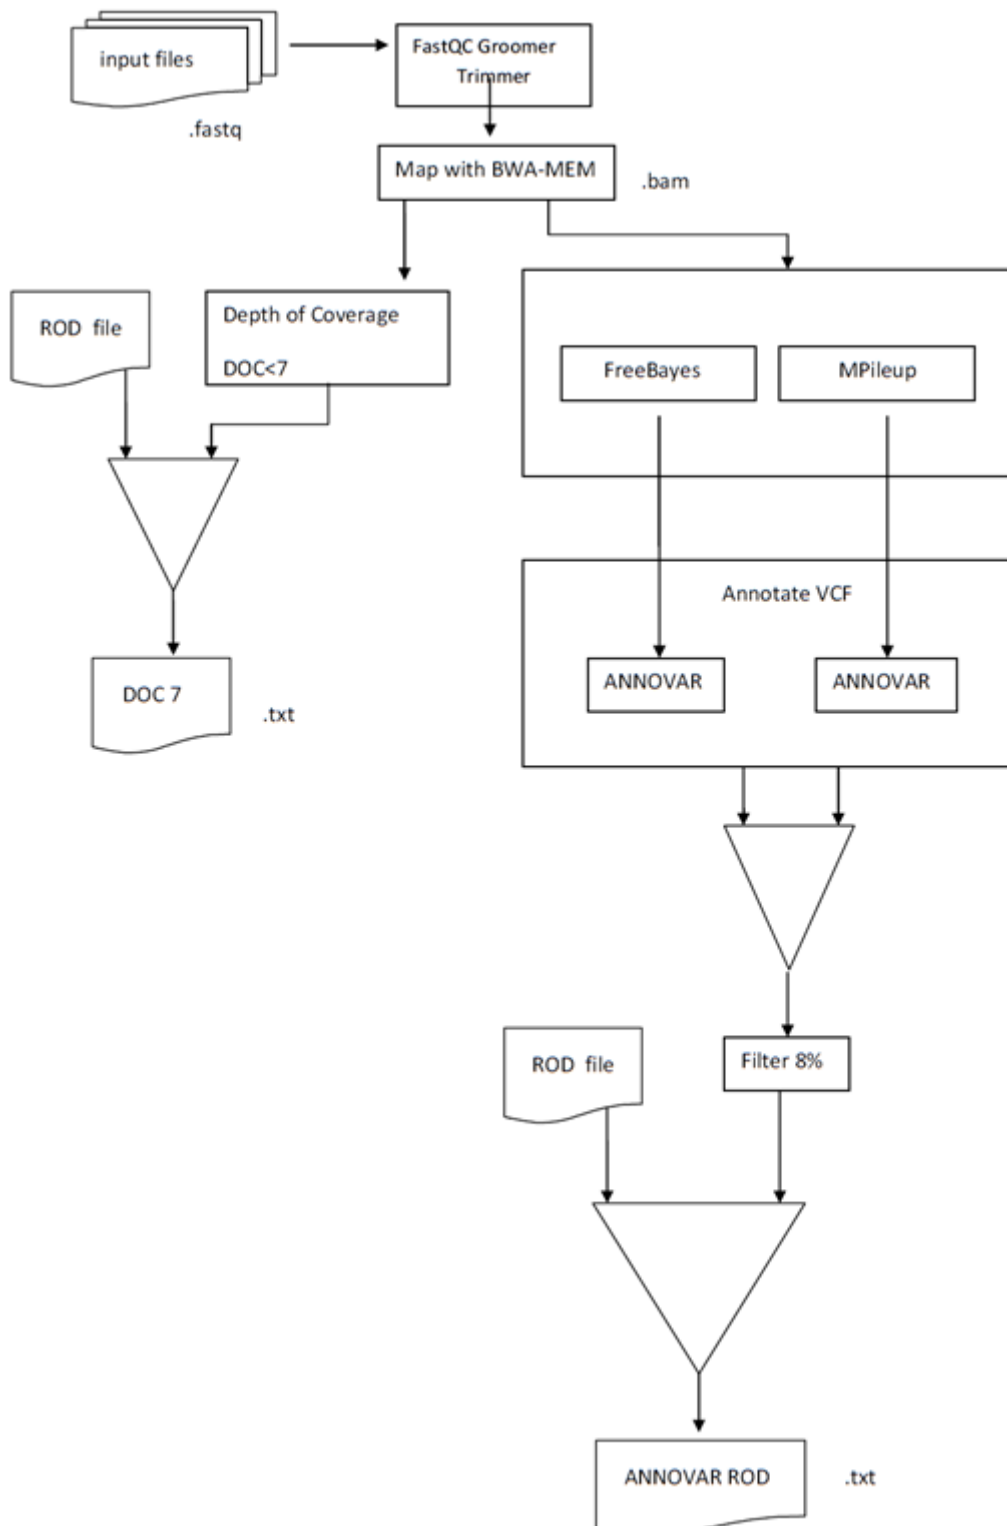

## FASTQ Groomer (version 1.0.4) (Blankenberg, et al., 2010)

| <b>Input Parameter</b>           | <b>Value</b>         |
|----------------------------------|----------------------|
| Input FASTQ quality scores type  | Sanger & Illumina    |
| Advanced Options                 | 1.8+                 |
| Output FASTQ quality scores type | advanced             |
| Force Quality Score encoding     | Sanger (recommended) |
| Summarize input data             | ASCII                |
|                                  | Summarize Input      |

## Map with BWA-MEM (version 0.8.0) (Li, 2013)

| <b>Input Parameter</b>                                                                                                                                                                | <b>Value</b> |
|---------------------------------------------------------------------------------------------------------------------------------------------------------------------------------------|--------------|
| BWA settings to use                                                                                                                                                                   | full         |
| Minimum seed length (-k)                                                                                                                                                              | 19           |
| Band width for banded alignment (-w)                                                                                                                                                  | 100          |
| Off-diagonal X-dropoff (-d)                                                                                                                                                           | 100          |
| Look for internal seeds inside a seed longer than the minimum seed length times this value (-r)                                                                                       | 42125        |
| Skip seeds with more occurrences than this value (-c)                                                                                                                                 | 10000        |
| Skip mate rescue (-S)                                                                                                                                                                 | False        |
| Skip pairing (-P)                                                                                                                                                                     | False        |
| Score for a sequence match (-A)                                                                                                                                                       | 1            |
| Penalty for a mismatch (-B)                                                                                                                                                           | 4            |
| Gap open penalty (-O)                                                                                                                                                                 | 6            |
| Gap extension penalty (-E)                                                                                                                                                            | 1            |
| Penalty for clipping (-L)                                                                                                                                                             | 5            |
| Penalty for an unpaired read pair (-U)                                                                                                                                                | 17           |
| Minimum score to output (-T)                                                                                                                                                          | 30           |
| Output all found alignments for single-end or unpaired paired-end reads (-a)                                                                                                          | False        |
| Mark shorter split hits as secondary (-M)                                                                                                                                             | False        |
| Specify the read group for this file? (-R)                                                                                                                                            | yes          |
| Read group identifier (ID). Each @RG line must have a unique ID. The value of ID is used in the RG tags of alignment records. Must be unique among all read groups in header section. |              |
| Platform/technology used to produce the reads (PL)                                                                                                                                    | ILLUMINA     |
| Library name (LB)                                                                                                                                                                     |              |
| Sample (SM)                                                                                                                                                                           |              |
| Platform unit (PU)                                                                                                                                                                    |              |
| Sequencing center that produced the read (CN)                                                                                                                                         |              |
| Description (DS)                                                                                                                                                                      |              |
| Date that run was produced (DT)                                                                                                                                                       |              |
| Flow order (FO). The array of nucleotide bases that correspond to the nucleotides used for each flow of each read                                                                     |              |

The array of nucleotide bases that correspond to the key sequence of each read (KS)

Programs used for processing the read group (PG)

Predicted median insert size (PI)

Suppress the header in the output SAM file False

### Depth of Coverage (version 0.0.7) (DePristo, et al., 2011)

|                                                                                                                                                                                                                                    |            |
|------------------------------------------------------------------------------------------------------------------------------------------------------------------------------------------------------------------------------------|------------|
| Using reference genome                                                                                                                                                                                                             | hg19       |
| RefSeq Rod                                                                                                                                                                                                                         | No dataset |
| Partition type for depth of coverage                                                                                                                                                                                               | sample     |
| Output format                                                                                                                                                                                                                      | table      |
| Basic or Advanced GATK options                                                                                                                                                                                                     | advanced   |
| How strict should we be in validating the pedigree information                                                                                                                                                                     | STRICT     |
| Genomic intervals                                                                                                                                                                                                                  | ROD file   |
| Interval set rule                                                                                                                                                                                                                  | UNION      |
| Type of reads downsampling to employ at a given locus                                                                                                                                                                              | NONE       |
| Type of BAQ calculation to apply in the engine                                                                                                                                                                                     | OFF        |
| BAQ gap open penalty (Phred Scaled)                                                                                                                                                                                                | 40.0       |
| Use the original base quality scores from the OQ tag                                                                                                                                                                               | False      |
| Value to be used for all base quality scores, when some are missing                                                                                                                                                                | 0          |
| How strict should we be with validation                                                                                                                                                                                            | STRICT     |
| Interval merging rule                                                                                                                                                                                                              | ALL        |
| Disable experimental low-memory sharding functionality.                                                                                                                                                                            | False      |
| Makes the GATK behave non deterministically, that is, the random numbers generated will be different in every run                                                                                                                  | False      |
| Fix mis-encoded base quality scores. Q0 == ASCII 33 according to the SAM specification, whereas Illumina encoding starts at Q64. The idea here is simple: we just iterate over all reads and subtract 31 from every quality score. | False      |
| Basic or Advanced Analysis options                                                                                                                                                                                                 | basic      |

### FreeBayes (0.9.14) (Garrison and Marth, 2012)

|                                                     |              |
|-----------------------------------------------------|--------------|
| Input Parameter                                     | Value        |
| Load reference genome from                          | history      |
| Use the following dataset as the reference sequence | hg19.fasta   |
| Limit variant calling to a set of regions?          | do_not_limit |
| Choose parameter selection level                    | simple       |

**MPileup (version 0.0.2) (Li, 2011a; Li, 2011b; Li, et al., 2009);**

| Input Parameter                                                                       | Value                                   |
|---------------------------------------------------------------------------------------|-----------------------------------------|
| Choose the source for the reference list                                              | history                                 |
| Using reference file                                                                  | hg19.fasta                              |
| Genotype Likelihood Computation                                                       | perform_genotype_likelihood_computation |
| Phred-scaled gap extension sequencing error probability                               | 20                                      |
| Coefficient for modeling homopolymer errors.                                          | 100                                     |
| Perform INDEL calling                                                                 | perform_indel_calling                   |
| Skip INDEL calling if the average per-sample depth is above                           | 250                                     |
| Phred-scaled gap open sequencing error probability                                    | 40                                      |
| Set advanced options                                                                  | advanced                                |
| Do not skip anomalous read pairs in variant calling                                   | False                                   |
| Disable probabilistic realignment for the computation of base alignment quality (BAQ) | True                                    |
| Coefficient for downgrading mapping quality for reads containing excessive mismatches | 0                                       |
| Max reads per BAM                                                                     | 250                                     |
| Extended BAQ computation                                                              | True                                    |
| List of regions or sites on which to operate                                          | No dataset                              |
| Minimum mapping quality for an alignment to be used                                   | 0                                       |
| Minimum base quality for a base to be considered                                      | 13                                      |
| Only generate pileup in region                                                        |                                         |
| Output per-sample read depth                                                          | False                                   |
| Output per-sample Phred-scaled strand bias P-value                                    | False                                   |

**ANNOVAR Annotate VCF (version 0.1)**

| Input Parameter    | Value                     |
|--------------------|---------------------------|
| Gene Annotations   | refGene ensGene knownGene |
| Annotation Regions | dgvMerged                 |

## Annotation Databases

avsift ljb\_sift ljb2\_sift ljb26\_sift  
ljb\_pp2 ljb2\_pp2hdiv  
ljb2\_pp2hvar ljb26\_pp2hvar  
ljb2\_phylop ljb23\_phylop  
ljb26\_phylop100way Vertebrate  
ljb23\_lrt ljb26\_lrt ljb26\_mt  
ljb26\_ma ljb26\_fathmm  
ljb26\_siphy ljb26\_gerp++  
ljb26 metasvm ljb26\_metalr  
ljb26\_vest ljb26\_cadd ljb26\_all  
cg46 cg69 cosmic70  
esp6500si\_all exac01  
AFR.sites.2014\_10  
ALL.sites.2014\_10  
AMR.sites.2014\_10  
EAS.sites.2014\_10  
EUR.sites.2014\_10  
SAS.sites.2014\_10 snp129  
snp138 snp130NonFlagged  
snp138NonFlagged  
clinvar\_20131105  
clinvar\_20140929 popfreq\_max  
popfreq\_all gerp++elem  
gerp++gt2 caddgt20 caddgt10

### Filter (version 1.1.0)

esp5400\_ea, esp5400\_all, esp6500si\_all < 8%

**SUPPLEMENTARY FILE PART 4:** Minimum requirements for a variant to be considered as variant of interest.

| <b>Tool</b>                                   | <b>Specifications</b>                                                                   | <b>Minimum requirements to be graded as variant of interest</b>                                                                                                                                                                                                                                                                                                             |
|-----------------------------------------------|-----------------------------------------------------------------------------------------|-----------------------------------------------------------------------------------------------------------------------------------------------------------------------------------------------------------------------------------------------------------------------------------------------------------------------------------------------------------------------------|
| <b>Effect of the mutation</b>                 | Nonsense mutations,<br>Missense mutations and<br>Synonymous variants<br>Splice variants | Nonsense variants – most interesting<br>Missense variants - carefully evaluated with all other tools,<br>Synonymous variants – only if previously reported as pathogenic OR if algorithms predict alternative splicing, otherwise not evaluated<br>Splice variants – variants $\pm 1-2\text{bp}$ most interesting, variants as much as $\pm 10\text{bp}$ are also evaluated |
| <b>Conservation score</b>                     | PhyloP, GERP                                                                            | At least some evidence of conservation – no negative values - Phylo $P > 0$ a GERP $> 0$                                                                                                                                                                                                                                                                                    |
| <b>Prediction tools</b>                       | Mutation Taster, PolyPhen2, SIFT                                                        | At least one deleterious prediction                                                                                                                                                                                                                                                                                                                                         |
| <b>Population frequency</b>                   | EVS, ExAC and 1000 genomes                                                              | less than 0.005% for AD,<br>less than 2% for AR,                                                                                                                                                                                                                                                                                                                            |
| <b>Population frequency in our population</b> | In-house database of variants                                                           | present in less than 3 alleles in one sequencing run (48 samples) AND present in 5 alleles or less than 5 alleles from 198 patients                                                                                                                                                                                                                                         |



**SUPPLEMENTARY FILE 5:**

**PATIENTS WITH MUTATIONS IN KNOWN IPN GENES: CLINICAL DATA**

**FIGURE 1 : PEDIGREES**

**Panel A - Pedigrees of IPN families with *AARS* (NM\_001605.2):p.Arg329His (c.986 G>A) mutation**

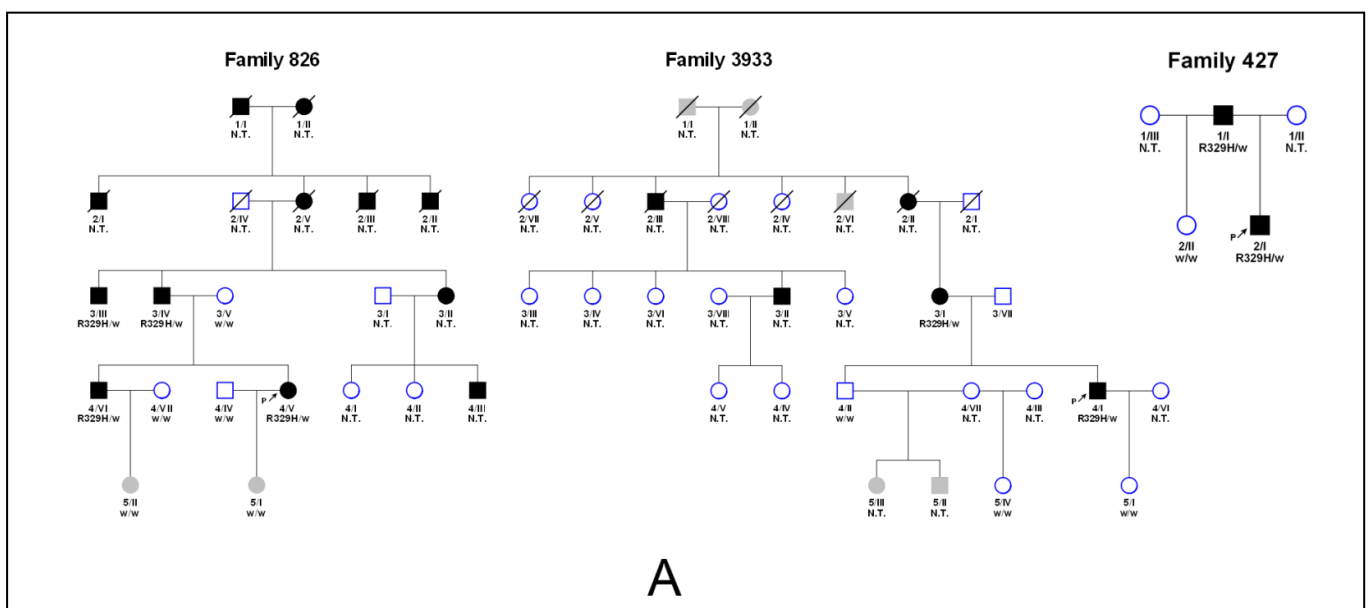

**A**

Legend: **square**: male; **circle**: female; **blacked filled symbol**: affected; **empty symbol**: unaffected; **slashed symbol**: deceased; **w.** – wild type; **N.T.** – not tested.; **R329H** - *AARS* (NM\_001605.2):p.Arg329His (c.986 G>A) mutation;

**FIGURE 2: PATIENT 4/V FROM FAMILY 826 AT THE AGE OF 41 YEARS**

Patient 4/V from family 826 with AARS mutation p.Arg329His at the age of 41. The most prominent feature is plegia of toes. Genua recurvata and Achill. tendon shortenings (to 90°) and absent tendon reflexes in all limbs were also observed.

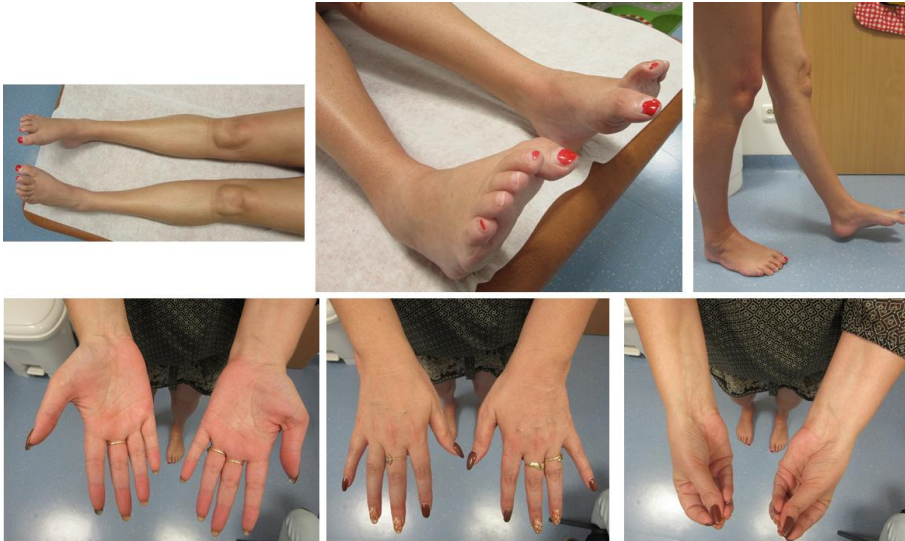

**TABLE 1: PATIENT 4/V FROM FAMILY 826 AT THE AGE OF 31 YEARS**

| 826 - AARS - age at examianation 31 | Test                             | Results                                                                             |
|-------------------------------------|----------------------------------|-------------------------------------------------------------------------------------|
| <b>Clinical course</b>              |                                  | First symptoms at the age of ten, difficulties running, jumping...                  |
| <b>Upper limbs</b>                  | Muscle atrophies                 | No                                                                                  |
|                                     | Contractures/ deformities        | No                                                                                  |
|                                     | Reflexes                         | Reflexes C5/6 are absent. Reflex C7 sin +                                           |
|                                     | Sensory testing                  |                                                                                     |
|                                     |                                  | Pin prick test                                                                      |
|                                     | Vibration test                   | Vibration test at fingers was 7/8                                                   |
| <b>Lower limbs</b>                  | Muscle atrophies                 | Slight atrophies distally are present                                               |
|                                     | Contractures/ deformities        | Achill. tendons shortening (90°)                                                    |
|                                     | Reflexes                         | Reflexes L2/S2 absent                                                               |
|                                     | Sensory testing                  | Sensory loss in stockings distribution                                              |
|                                     |                                  | Pin prick test                                                                      |
|                                     | Vibration test                   | At toe tips 5/8                                                                     |
| <b>Gait</b>                         |                                  | Able to walk without support, not able to stand on heels or toes                    |
| <b>Other</b>                        |                                  | No                                                                                  |
| <b>EMG test - summary</b>           | Sensory nerve conduction studies | Sural nerve sensory response not evoked                                             |
|                                     | Motor nerve condusion studies    | Normal nerve conduction velocities, but reduction in CMAP (3.5mV median nerve Left) |

## SUPPLEMENTARY FILE 6:

### PATIENTS WITH NOVEL VARIANTS IN KNOWN IPN GENES (TABLE 2):

#### CLINICAL DATA

##### ***BICD2* (NM\_001003800.1):p.Gly514Ser (c.1540G>A)**

The patient is a sporadic case in the family, segregation analysis has not been possible, but the mutation might be causal based on information that the mutation is located in Bicaudal-D protein domain, both SIFT and Mutation Taster predictions are serious, and the variant has no population frequency score.

##### ***DCTN1* (NM\_004082.4):p.Ala163Thr (c.487G>A)**

This variant was detected in a male patient with axonal neuropathy. From other family members only the daughter as the only offspring of the patient was available for DNA and neurological examination. The daughter is healthy and is not a carrier of the mutation in the *DCTN1* gene. The mother of the patient is deceased, the father is unknown. A different mutation in *DCTN1* gene has been described in a paper by Puls, et al. <sup>1</sup>. They describe a family with autosomal dominant form of slowly progressive lower motor neuron disease without sensory symptoms. Normal sensory NCV was observed also for our patient. However, authors Puls and colleagues also describe additional features, vocal cord paralysis and small hand muscle atrophy, which were not observed in our patient.

---

<sup>1</sup> Puls I, Jonnakuty C, LaMonte BH, et al. Mutant dynactin in motor neuron disease. *Nat Genet.* Apr 2003;33(4):455-456.

**Table 2: A patient with *DCTN1* (NM\_004082.4):p.Ala163Thr (c.487G>A) mutation at the age of 49.**

| <b>4411 - DCTN1 - age 49</b> | <b>Test</b>                                                              | <b>Results</b>                                                                                           |                                                            |
|------------------------------|--------------------------------------------------------------------------|----------------------------------------------------------------------------------------------------------|------------------------------------------------------------|
| <b>Clinical course</b>       |                                                                          | First symptoms at the age of ten,                                                                        |                                                            |
| <b>Upper limbs</b>           | Muscle atrophies                                                         | No                                                                                                       |                                                            |
|                              | Contractures/ deformities                                                | No                                                                                                       |                                                            |
|                              | Reflexes                                                                 | Reflexes C5-C8 are absent.                                                                               |                                                            |
|                              | Muscle strenght (MRC scale - Medical Research Council scale): grades 0-5 |                                                                                                          | Muscle strength is preserved.                              |
|                              |                                                                          |                                                                                                          | Shoulder abduction, elbow flexion/extension 5              |
|                              |                                                                          |                                                                                                          | N.A                                                        |
|                              |                                                                          | N.A.                                                                                                     |                                                            |
| Sensory testing              |                                                                          |                                                                                                          |                                                            |
|                              | Pin prick test                                                           |                                                                                                          |                                                            |
|                              | Vibration test                                                           | Vibration test at fingers was 7/8                                                                        |                                                            |
| <b>Lower limbs</b>           | Muscle atrophies                                                         | At lower limbs profound atrophies distally are present, plus hypotrophies up to mid thigh - symetrically |                                                            |
|                              | Contractures/ deformities                                                | Foot deformity - pes cavus, Achill. tendons shortening (90°)                                             |                                                            |
|                              | Reflexes                                                                 | Knee reflex was present, but depressed (1+), ankle reflex absent (0)                                     |                                                            |
|                              | Muscle strenght (MRC scale - Medical Research Council scale): grades 0-5 |                                                                                                          | Muscle strength proximally was preserved, but not distally |
|                              |                                                                          |                                                                                                          | Hip flexion/extension 5                                    |
|                              |                                                                          |                                                                                                          | Knee flexion/extension 5                                   |
|                              |                                                                          |                                                                                                          | Foot dorsiflexion/plantar flexion 4                        |
|                              |                                                                          | Big toe extension/ toes extension 4                                                                      |                                                            |
| Sensory testing              |                                                                          |                                                                                                          |                                                            |
|                              | Filamentum test                                                          | plantum 2/10                                                                                             |                                                            |
|                              | Vibration test                                                           | At toe tips 0/8, metatarsal phalangeal joint 5/8 and tibial tuberosity was 5/8.                          |                                                            |
| <b>Gait</b>                  |                                                                          | Able to walk without support, not able to stand on heels or toes                                         |                                                            |
| <b>Other</b>                 |                                                                          | Romberg +                                                                                                |                                                            |
| <b>EMG test - summary</b>    | Sensory nerve conduction studies                                         | Normal                                                                                                   |                                                            |
|                              | Motor nerve conduction studies                                           | N.A.                                                                                                     |                                                            |

### ***GNB4* (NM\_021629.3):p.Arg42Gln (c.125G>A)**

The index patient from this family presented with intermediate type of CMT. The same was described in a primary report by Soong, et al.<sup>2</sup>. Similarly, an affected brother of the patient has the same mutation. The variant is in a highly conserved region. The SIFT and Mutation taster predictions are deleterious/disease causing. The mutation has no frequency in EVS, however, in ExAC, the mutation has been reported in 4 alleles (out of 121000), but these were from different populations [Latino (3 alleles) and South Asian (1 allele) populations].

### ***SETX* (NM\_015046.5):p.Ile1942Thr (c.5825T>C)**

A variant p.Ile1942Thr was detected on both alleles of the *SETX* gene (in homozygous state). Only heterozygous mutations in the *SETX* gene have been described as a cause of HMN so far. This variant is interesting as it is highly conserved, predictions are deleterious and there is no population frequency in EVS and only 0.001% in ExAC. A brother of the patient is similarly affected. Therefore, testing him for the presence of the mutation would help to elucidate the character of the variant. However, he was not available for DNA testing and neurological reexamination. We speculate these siblings might be affected by an autosomal recessive ataxia with oculomotor apraxia caused by biallelic loss of function mutations in the *SETX* gene, but we are not able to prove this at this time.

---

<sup>2</sup> Soong BW, Huang YH, Tsai PC, et al. Exome sequencing identifies *GNB4* mutations as a cause of dominant intermediate Charcot-Marie-Tooth disease. *Am J Hum Genet.* Mar 7 2013;92(3):422-430.

## SUPPLEMENTARY FILE 7:

### Likely Benign Variants

That are either listed in HGMD or are otherwise interesting, but turned out to be rare benign variants are presented in supplementary file table 3.

| Gene(Ref. sequence)       | Variations at DNA-level (relative to coding DNA sequence)<br>Variation at protein level (deduced) | No. of families | Reasons why likely benign                                                                                                                                                                     | Primary reason why interesting                                                           | Pathogenicity predictions | Locus conservation | ExAC (0.3.1) allele frequency |
|---------------------------|---------------------------------------------------------------------------------------------------|-----------------|-----------------------------------------------------------------------------------------------------------------------------------------------------------------------------------------------|------------------------------------------------------------------------------------------|---------------------------|--------------------|-------------------------------|
| BICD2<br>(NM_001003800.1) | c.269 G>A<br>(p. Lys90Arg)                                                                        | 2               | Population frequency<br>(EVS 0,58%)                                                                                                                                                           | Listed in<br>HGMD as<br>DM?;                                                             | SIFT:T                    | N:W                | All                           |
|                           |                                                                                                   |                 |                                                                                                                                                                                               |                                                                                          | MT:DC                     | AA:M               | G=0,47%                       |
| DNM2<br>(NM_001005361.2)  | c.2156G>A<br>(p.Arg719Gln)                                                                        | 1               | rare benign<br>polymorphism,<br>healthy mother and a<br>healthy brother are<br>also carriers                                                                                                  | Highly<br>conserved,<br>deleterious<br>predictions,                                      | SIFT:D                    | N:highly           | No                            |
|                           |                                                                                                   |                 |                                                                                                                                                                                               |                                                                                          | MT:DC                     | AA:highly          |                               |
| DNM2<br>(NM_001005360)    | c.2201A>G<br>(p.Asn734Ser)                                                                        | 1               | Not segregating,<br>healthy mother of<br>the patient is a<br>carrier                                                                                                                          |                                                                                          | SIFT:T                    | N:N.C.             | All                           |
|                           |                                                                                                   |                 |                                                                                                                                                                                               |                                                                                          | MT:DC                     | AA:M               | G=0,029%                      |
| DYNC1H1<br>(NM_001376.4)  | c.239A>T<br>(p.Glu80Val)                                                                          | 1               | Similarly affected<br>sister is not a carrier<br>of the variant, the<br>phenotype of the<br>patient is different<br>from what has been<br>published for<br>patients with<br>DYNC1H1 mutations | Mutation<br>Taster<br>prediction:<br>disease<br>causing; no<br>frequency<br>data in EVS; | SIFT:T                    | N:M                | No                            |
|                           |                                                                                                   |                 |                                                                                                                                                                                               |                                                                                          | MT:DC                     | AA:W               |                               |
| HARS<br>(NM_002109.5)     | c.1402 G>A<br>(p.Glu468Lys)                                                                       | 1               | Not segregating, the<br>mother of the patient<br>is a carrier of the<br>variant, the mother is<br>healthy                                                                                     | Novel variant<br>in new CMT<br>gene, without<br>population<br>frequency;                 | SIFT:T                    | N:M                | All                           |
|                           |                                                                                                   |                 |                                                                                                                                                                                               |                                                                                          | MT:DC                     | AA:M               | A=0,014%                      |
| HARS<br>(NM_002109.5)     | c.614G>A<br>(p.Gly205Asp)                                                                         | 1               | Not segregating, the<br>healthy father of the<br>patient is also a<br>carrier of the<br>mutation,                                                                                             |                                                                                          | SIFT:T                    | N:highly           | All                           |
|                           |                                                                                                   |                 |                                                                                                                                                                                               |                                                                                          | MT:DC                     | AA:highly          | A=0,26%                       |
| HSPB1<br>(NM_001540.3)    | c.390G>C<br>(p.Glu130Asp)                                                                         | 1               | Not segregating<br>(large pedigree)                                                                                                                                                           |                                                                                          | SIFT:T                    | N:highly           | No                            |
|                           |                                                                                                   |                 |                                                                                                                                                                                               |                                                                                          | MT:DC                     | AA:highly          |                               |

|                       |                             |   |                                     |        |           |           |
|-----------------------|-----------------------------|---|-------------------------------------|--------|-----------|-----------|
| GARS<br>(NM_002047.2) | c.2074 A>G<br>(p.Met692Val) | 1 | Not segregating<br>(large pedigree) | SIFT:T | N:highly  | No        |
|                       |                             |   |                                     | MT:DC  | AA:highly |           |
| NEFL<br>(NM_006158.4) | c.1585A>G<br>(p.Lys529Glu)  | 1 | Not segregating<br>(large pedigree) | SIFT:T | N:W       | All       |
|                       |                             |   |                                     | PP2:B  | AA:highly | G=0,0033% |

**Table 3: Likely benign variants: Novel variants in known IPN genes that turned out to be rare benign variants.**

Legend: Data were analyzed using software: **Alamut Visual version 2.8 (Interactive Biosoftware, Rouen, France)[2016-07-21]**

SIFT- D:deleterious; T:tolerated

MT- Mutation Taster- DC: disease causing

PP2- PolyPhen2; B-benign

Conservation: N- nucleotide; AA-amino acid; Highly; M-moderate;W:weakly;N.C.:not conserved

**SUPPLEMENTARY FILE 8:** Table of rare benign variants in our population = variants present in more than 5 alleles out of 306 (153 patients)

| CHR | POS      | REF=> ALT | Number of families with variant | RefGene_function | RefGene_gene |
|-----|----------|-----------|---------------------------------|------------------|--------------|
| 1   | 6528468  | C=>T      | 25                              | exonic           | PLEKHG5      |
| 1   | 6528589  | C=>T      | 13                              | exonic           | PLEKHG5      |
| 1   | 6529182  | TTCC=>T   | 18                              |                  | PLEKHG5      |
| 1   | 6529188  | C=>T      | 26                              | exonic           | PLEKHG5      |
| 1   | 6529443  | A=>G      | 30                              | exonic           | PLEKHG5      |
| 1   | 6531124  | T=>C      | 24                              | exonic           | PLEKHG5      |
| 1   | 6531589  | C=>T      | 14                              | exonic           | PLEKHG5      |
| 1   | 6531650  | C=>T      | 22                              | exonic           | PLEKHG5      |
| 1   | 6533393  | G=>C      | 39                              | exonic           | PLEKHG5      |
| 1   | 6545390  | A=>T      | 40                              | exonic           | PLEKHG5      |
| 1   | 6550505  | C=>T      | 11                              | UTR5             | PLEKHG5      |
| 1   | 6557009  | A=>C      | 41                              | intronic         | PLEKHG5      |
| 1   | 6579521  | G=>C      | 10                              | exonic           | PLEKHG5      |
| 1   | 10271688 | C=>G      | 12                              | intronic         | KIF1B        |
| 1   | 10318652 | C=>G      | 34                              | exonic           | KIF1B        |
| 1   | 10355834 | C=>T      | 21                              | intronic         | KIF1B        |
| 1   | 10364057 | A=>G      | 5                               | exonic           | KIF1B        |

|   |           |               |     |          |        |
|---|-----------|---------------|-----|----------|--------|
| 1 | 10364260  | A=>G          | 6   | exonic   | KIF1B  |
| 1 | 10421878  | A=>G          | 20  | exonic   | KIF1B  |
| 1 | 10435324  | C=>A          | 70  | exonic   | KIF1B  |
| 1 | 12040324  | A=>G          | 41  | UTR5     | MFN2   |
| 1 | 12040479  | T=>C          | 50  | UTR5     | MFN2   |
| 1 | 12065841  | C=>T          | 7   | exonic   | MFN2   |
| 1 | 33245802  | C=>G          | 35  | exonic   | YARS   |
| 1 | 115829313 | G=>A          | 112 | exonic   | NGF    |
| 1 | 156105028 | T=>C          | 13  | exonic   | LMNA   |
| 1 | 156106185 | T=>C          | 33  | exonic   | LMNA   |
| 1 | 156107534 | C=>T          | 66  | exonic   | LMNA   |
| 1 | 156785617 | G=>A          | 125 | UTR5     | NTRK1  |
| 1 | 156846233 | G=>A          | 55  | exonic   | NTRK1  |
| 1 | 156848909 | CA=>C         | 8   | exonic   | NTRK1  |
| 1 | 156848918 | C=>T          | 18  | exonic   | NTRK1  |
| 1 | 156848946 | G=>T          | 17  | exonic   | NTRK1  |
| 1 | 156848995 | C=>T          | 93  | exonic   | NTRK1  |
| 1 | 161275943 | C=>T          | 11  | exonic   | MPZ    |
| 2 | 74596527  | C=>T          | 8   | exonic   | DCTN1  |
| 2 | 74598723  | T=>C          | 7   | exonic   | DCTN1  |
| 2 | 86481835  | C=>T          | 57  | exonic   | REEP1  |
| 2 | 86507135  | A=>G          | 14  | intronic | REEP1  |
| 2 | 108608648 | A=>G          | 16  | exonic   | SLC5A7 |
| 2 | 198362018 | T=>C          | 16  | exonic   | HSPD1  |
| 2 | 198363504 | A=>G          | 21  | exonic   | HSPD1  |
| 2 | 198364518 | G=>A          | 23  | UTR5     | HSPD1  |
| 2 | 220146651 | G=>A          | 25  | intronic | DNAJB2 |
| 2 | 220147847 | G=>A          | 6   | intronic | DNAJB2 |
| 2 | 235949877 | T=>C          | 11  | exonic   | SH3BP4 |
| 2 | 235949920 | A=>G          | 10  | exonic   | SH3BP4 |
| 2 | 235950002 | G=>A          | 12  | exonic   | SH3BP4 |
| 2 | 235950187 | T=>C          | 34  | exonic   | SH3BP4 |
| 2 | 235950284 | A=>C          | 9   | exonic   | SH3BP4 |
| 2 | 235950391 | C=>T          | 5   | exonic   | SH3BP4 |
| 2 | 235951819 | A=>G          | 50  | exonic   | SH3BP4 |
| 2 | 241680802 | G=>A          | 64  | intronic | KIF1A  |
| 2 | 241685586 | G=>A          | 19  | exonic   | KIF1A  |
| 2 | 241696837 | CTCATCCTCC=>C | 30  | exonic   | KIF1A  |
| 2 | 241696840 | ATCC=>A       | 63  | exonic   | KIF1A  |
| 2 | 241700676 | G=>A          | 9   | exonic   | KIF1A  |
| 2 | 241706757 | T=>C          | 12  | exonic   | KIF1A  |
| 2 | 241713646 | A=>G          | 70  | exonic   | KIF1A  |
| 2 | 241722445 | G=>A          | 38  | intronic | KIF1A  |
| 2 | 241727459 | G=>C          | 60  | intronic | KIF1A  |
| 2 | 241727461 | T=>C          | 39  | intronic | KIF1A  |



|   |           |         |     |          |         |
|---|-----------|---------|-----|----------|---------|
| 3 | 100467018 | T=>C    | 100 | exonic   | TFG     |
| 3 | 128525253 | C=>T    | 16  | exonic   | RAB7A   |
| 3 | 179137273 | A=>G    | 38  | exonic   | GNB4    |
| 3 | 179169230 | T=>G    | 24  | UTR5     | GNB4    |
| 4 | 154074370 | CCTT=>C | 19  |          |         |
| 4 | 154197234 | T=>G    | 25  | exonic   | TRIM2   |
| 4 | 154216710 | G=>A    | 50  | exonic   | TRIM2   |
| 5 | 10250430  | G=>A    | 140 | UTR5     | CCT5    |
| 5 | 10250443  | T=>C    | 140 | UTR5     | CCT5    |
| 5 | 10250728  | C=>G    | 60  | intronic | CCT5    |
| 5 | 10254817  | A=>G    | 129 | exonic   | CCT5    |
| 5 | 10256161  | T=>C    | 101 | exonic   | CCT5    |
| 5 | 10258512  | G=>A    | 13  | exonic   | CCT5    |
| 5 | 10262740  | C=>A    | 101 | intronic | CCT5    |
| 5 | 16478200  | G=>A    | 76  | exonic   | FAM134B |
| 5 | 32379210  | G=>A    | 16  | intronic | ZFR     |
| 5 | 32400266  | A=>G    | 23  | exonic   | ZFR     |
| 5 | 32403346  | C=>T    | 32  | exonic   | ZFR     |
| 5 | 53751901  | G=>A    | 115 | exonic   | HSPB3   |
| 5 | 53751988  | T=>C    | 121 | exonic   | HSPB3   |
| 5 | 130500751 | A=>C    | 65  | intronic | HINT1   |
| 5 | 130500842 | A=>G    | 9   | exonic   | HINT1   |
| 5 | 140054257 | C=>T    | 57  | intronic | HARS    |
| 5 | 140057535 | G=>A    | 30  | exonic   | HARS    |
| 5 | 148383345 | C=>G    | 37  | UTR3     | SH3TC2  |
| 5 | 148383411 | TCAA=>T | 17  | UTR3     | SH3TC2  |
| 5 | 148383412 | CAA=>C  | 40  | UTR3     | SH3TC2  |
| 5 | 148386525 | T=>C    | 5   | exonic   | SH3TC2  |
| 5 | 148386525 | T=>G    | 98  | exonic   | SH3TC2  |
| 5 | 148388420 | C=>T    | 12  | exonic   | SH3TC2  |
| 5 | 148406386 | T=>C    | 36  | intronic | SH3TC2  |
| 5 | 148407708 | A=>C    | 142 | exonic   | SH3TC2  |
| 5 | 148407893 | C=>A    | 67  | exonic   | SH3TC2  |
| 5 | 148408101 | A=>G    | 110 | exonic   | SH3TC2  |
| 5 | 148425518 | A=>T    | 32  | intronic | SH3TC2  |
| 6 | 33626905  | G=>T    | 13  | intronic | ITPR3   |
| 6 | 33626906  | T=>G    | 6   | intronic | ITPR3   |
| 6 | 33636907  | C=>T    | 58  | exonic   | ITPR3   |
| 6 | 33638180  | C=>T    | 30  | exonic   | ITPR3   |
| 6 | 33641379  | T=>C    | 54  | exonic   | ITPR3   |
| 6 | 33643558  | G=>A    | 37  | exonic   | ITPR3   |
| 6 | 33646328  | T=>C    | 59  | intronic | ITPR3   |
| 6 | 33647651  | A=>G    | 63  | intronic | ITPR3   |
| 6 | 33648097  | A=>G    | 13  | intronic | ITPR3   |
| 6 | 33648228  | C=>T    | 69  | splicing | ITPR3   |

|   |           |                                |     |                   |             |
|---|-----------|--------------------------------|-----|-------------------|-------------|
| 6 | 33650430  | G=>C                           | 36  | intronic          | ITPR3       |
| 6 | 33651129  | C=>T                           | 24  | exonic            | ITPR3       |
| 6 | 33653448  | C=>T                           | 54  | exonic            | ITPR3       |
| 6 | 33653486  | G=>A                           | 13  | exonic            | ITPR3       |
| 6 | 33658780  | C=>T                           | 5   | exonic            | ITPR3       |
| 6 | 33659472  | C=>G                           | 57  | exonic            | ITPR3       |
| 6 | 109767632 | T=>TGTGGTCTGGTCAGTGACCTGCCCAGG | 5   | intronic          | MICAL1      |
| 6 | 109767644 | C=>T                           | 12  | intronic          | MICAL1      |
| 6 | 109767930 | G=>T                           | 67  | exonic            | MICAL1      |
| 6 | 109767931 | C=>T                           | 52  | exonic            | MICAL1      |
| 6 | 109768295 | G=>A                           | 83  | exonic            | MICAL1      |
| 6 | 109770869 | G=>A                           | 17  | exonic            | MICAL1      |
| 6 | 109771691 | G=>A                           | 5   | exonic            | MICAL1      |
| 6 | 109775366 | C=>T                           | 17  | exonic            | MICAL1      |
| 6 | 109775436 | T=>C                           | 85  | exonic            | MICAL1      |
| 6 | 110036274 | T=>C                           | 7   | intronic          | FIG4        |
| 6 | 110064928 | A=>T                           | 10  | exonic            | FIG4        |
| 6 | 110106234 | A=>G                           | 26  | intronic          | FIG4        |
| 6 | 110107517 | T=>C                           | 32  | exonic            | FIG4        |
| 6 | 110146303 | G=>A                           | 96  | exonic            | FIG4        |
| 7 | 30634630  | G=>C                           | 17  | exonic            | GARS        |
| 7 | 30634661  | C=>G                           | 132 | exonic            | GARS        |
| 7 | 30634764  | C=>T                           | 17  | intronic          | GARS        |
| 7 | 30673345  | C=>T                           | 106 | intronic          | GARS        |
| 7 | 75932038  | G=>A                           | 5   | exonic            | HSPB1       |
| 8 | 1806229   | A=>C                           | 66  | exonic            | ARHGEF10    |
| 8 | 1806288   | T=>C                           | 8   | intronic          | ARHGEF10    |
| 8 | 1806289   | T=>C                           | 8   | intronic          | ARHGEF10    |
| 8 | 1808256   | A=>G                           | 13  | exonic            | ARHGEF10    |
| 8 | 1817367   | G=>A                           | 60  | exonic            | ARHGEF10    |
| 8 | 1830794   | G=>A                           | 28  | intronic          | ARHGEF10    |
| 8 | 1833801   | G=>C                           | 13  | exonic            | ARHGEF10    |
| 8 | 1841758   | T=>C                           | 9   | exonic            | ARHGEF10    |
| 8 | 1846688   | C=>T                           | 14  | exonic            | ARHGEF10    |
| 8 | 1857548   | T=>C                           | 40  | exonic            | ARHGEF10    |
| 8 | 1857591   | G=>A                           | 9   | exonic            | ARHGEF10    |
| 8 | 1873540   | C=>T                           | 24  | exonic            | ARHGEF10    |
| 8 | 1876631   | C=>T                           | 37  | exonic            | ARHGEF10    |
| 8 | 1877480   | T=>G                           | 30  | exonic            | ARHGEF10    |
| 8 | 1900911   | C=>T                           | 28  | exonic            | ARHGEF10    |
| 8 | 1905132   | G=>A                           | 87  | exonic            | ARHGEF10    |
| 8 | 24811063  | GAG=>G                         | 6   |                   |             |
| 8 | 24811064  | AG=>A                          | 138 | "exonic;splicing" | "NEFL;NEFL" |
| 8 | 75262798  | G=>C                           | 106 | exonic            | GDAP1       |
| 8 | 75274141  | T=>G                           | 79  | exonic            | GDAP1       |

|    |           |                 |     |          |         |
|----|-----------|-----------------|-----|----------|---------|
| 8  | 134260174 | G=>A            | 49  | intronic | NDRG1   |
| 8  | 134260948 | A=>G            | 10  | intronic | NDRG1   |
| 8  | 134292516 | A=>G            | 102 | intronic | NDRG1   |
| 9  | 35060302  | T=>C            | 27  | intronic | VCP     |
| 9  | 35061694  | G=>GACAGTACACAA | 22  | intronic | VCP     |
| 9  | 35062972  | C=>T            | 58  | intronic | VCP     |
| 9  | 35071773  | G=>A            | 6   | intronic | VCP     |
| 9  | 35071774  | C=>A            | 6   | intronic | VCP     |
| 9  | 94812355  | T=>C            | 5   | intronic | SPTLC1  |
| 9  | 111641825 | G=>A            | 8   | exonic   | IKBKAP  |
| 9  | 111651620 | A=>T            | 54  | exonic   | IKBKAP  |
| 9  | 111653574 | C=>G            | 83  | exonic   | IKBKAP  |
| 9  | 111656228 | T=>A            | 6   | exonic   | IKBKAP  |
| 9  | 111659439 | T=>C            | 12  | exonic   | IKBKAP  |
| 9  | 111659483 | T=>G            | 41  | exonic   | IKBKAP  |
| 9  | 111660851 | C=>T            | 6   | exonic   | IKBKAP  |
| 9  | 111663754 | G=>A            | 21  | exonic   | IKBKAP  |
| 9  | 111663793 | C=>T            | 22  | exonic   | IKBKAP  |
| 9  | 111668652 | C=>T            | 9   | exonic   | IKBKAP  |
| 9  | 111678508 | C=>T            | 8   | exonic   | IKBKAP  |
| 9  | 111679872 | G=>A            | 12  | exonic   | IKBKAP  |
| 9  | 111679940 | T=>C            | 11  | exonic   | IKBKAP  |
| 9  | 111688828 | C=>T            | 21  | exonic   | IKBKAP  |
| 9  | 111696389 | G=>C            | 30  | UTR5     | IKBKAP  |
| 9  | 130214414 | C=>T            | 5   | intronic | LRSAM1  |
| 9  | 130219669 | C=>T            | 115 | exonic   | LRSAM1  |
| 9  | 130242109 | C=>T            | 109 | intronic | LRSAM1  |
| 9  | 130242166 | A=>G            | 132 | exonic   | LRSAM1  |
| 9  | 130258319 | A=>C            | 8   | exonic   | LRSAM1  |
| 9  | 130259618 | A=>C            | 132 | intronic | LRSAM1  |
| 9  | 135139826 | T=>C            | 7   | exonic   | SETX    |
| 9  | 135139901 | T=>C            | 76  | exonic   | SETX    |
| 9  | 135152439 | A=>G            | 16  | intronic | SETX    |
| 9  | 135158690 | C=>T            | 5   | exonic   | SETX    |
| 9  | 135172412 | A=>G            | 31  | exonic   | SETX    |
| 9  | 135173685 | T=>C            | 41  | exonic   | SETX    |
| 9  | 135202829 | T=>C            | 82  | exonic   | SETX    |
| 9  | 135203231 | C=>T            | 107 | exonic   | SETX    |
| 9  | 135203409 | A=>C            | 96  | exonic   | SETX    |
| 9  | 135203530 | A=>C            | 6   | exonic   | SETX    |
| 9  | 135203838 | G=>A            | 22  | exonic   | SETX    |
| 9  | 135204010 | T=>C            | 9   | exonic   | SETX    |
| 9  | 135205006 | G=>C            | 11  | exonic   | SETX    |
| 9  | 135206460 | A=>G            | 77  | exonic   | SETX    |
| 10 | 50820345  | C=>A            | 134 | exonic   | SLC18A3 |

|    |          |        |     |                |                |
|----|----------|--------|-----|----------------|----------------|
| 10 | 50820370 | C=>T   | 9   | exonic         | SLC18A3        |
| 10 | 64573771 | C=>T   | 143 | exonic         | EGR2           |
| 10 | 71038431 | C=>T   | 7   | intronic       | HK1            |
| 10 | 71060610 | A=>G   | 102 | exonic         | HK1            |
| 10 | 71060621 | C=>T   | 14  | intronic       | HK1            |
| 10 | 71103597 | C=>G   | 70  | exonic         | HK1            |
| 10 | 71142420 | G=>A   | 124 | exonic         | HK1            |
| 10 | 99498234 | G=>A   | 46  | UTR5           | ZFYVE27        |
| 10 | 99504595 | G=>A   | 6   | exonic         | ZFYVE27        |
| 10 | 99504630 | G=>T   | 65  | exonic         | ZFYVE27        |
| 11 | 9812236  | G=>A   | 76  | ncRNA_intronic | SBF2-AS1       |
| 11 | 9853777  | G=>C   | 15  | exonic         | SBF2           |
| 11 | 9861208  | G=>C   | 8   | exonic         | SBF2           |
| 11 | 9879838  | C=>T   | 25  | exonic         | SBF2           |
| 11 | 10019879 | G=>A   | 11  | exonic         | SBF2           |
| 11 | 62458275 | T=>C   | 50  | exonic         | BSCL2          |
| 11 | 62469929 | C=>A   | 38  | ncRNA_intronic | HNRNPUL2-BSCL2 |
| 11 | 62473752 | C=>T   | 5   | ncRNA_intronic | HNRNPUL2-BSCL2 |
| 11 | 68671419 | C=>T   | 53  | UTR5           | IGHMBP2        |
| 11 | 68671477 | T=>C   | 142 | exonic         | IGHMBP2        |
| 11 | 68673630 | C=>T   | 5   | exonic         | IGHMBP2        |
| 11 | 68678962 | T=>C   | 141 | exonic         | IGHMBP2        |
| 11 | 68682402 | A=>G   | 53  | exonic         | IGHMBP2        |
| 11 | 68701948 | C=>T   | 52  | exonic         | IGHMBP2        |
| 11 | 68703959 | A=>G   | 55  | exonic         | IGHMBP2        |
| 11 | 68704028 | C=>T   | 45  | exonic         | IGHMBP2        |
| 11 | 68704264 | C=>T   | 83  | exonic         | IGHMBP2        |
| 11 | 68705674 | C=>A   | 51  | exonic         | IGHMBP2        |
| 11 | 95580926 | G=>A   | 8   | exonic         | MTMR2          |
| 11 | 95657111 | T=>G   | 77  | exonic         | MTMR2          |
| 12 | 862989   | T=>C   | 144 | exonic         | WNK1           |
| 12 | 863152   | G=>A   | 22  | exonic         | WNK1           |
| 12 | 939302   | A=>G   | 90  | exonic         | WNK1           |
| 12 | 968400   | C=>A   | 17  | intronic       | WNK1           |
| 12 | 968489   | T=>C   | 16  | exonic         | WNK1           |
| 12 | 970174   | T=>A   | 15  | intronic       | WNK1           |
| 12 | 971291   | C=>T   | 15  | exonic         | WNK1           |
| 12 | 974404   | T=>C   | 114 | exonic         | WNK1           |
| 12 | 987482   | G=>A   | 78  | exonic         | WNK1           |
| 12 | 987534   | C=>CTT | 36  | intronic       | WNK1           |
| 12 | 988894   | G=>A   | 30  | exonic         | WNK1           |
| 12 | 990912   | A=>C   | 125 | exonic         | WNK1           |
| 12 | 992229   | C=>T   | 19  | intronic       | WNK1           |

|    |           |                  |     |          |         |
|----|-----------|------------------|-----|----------|---------|
| 12 | 993930    | C=>T             | 90  | exonic   | WNK1    |
| 12 | 994014    | C=>T             | 42  | exonic   | WNK1    |
| 12 | 994487    | G=>C             | 144 | exonic   | WNK1    |
| 12 | 998365    | G=>T             | 60  | exonic   | WNK1    |
| 12 | 1017197   | C=>T             | 143 | exonic   | WNK1    |
| 12 | 32655085  | C=>T             | 10  | UTR5     | FGD4    |
| 12 | 32687352  | A=>G             | 5   | intronic | FGD4    |
| 12 | 32735236  | C=>T             | 86  | exonic   | FGD4    |
| 12 | 32755259  | G=>A             | 21  | intronic | FGD4    |
| 12 | 32764184  | G=>A             | 42  | exonic   | FGD4    |
| 12 | 32777362  | G=>A             | 37  | exonic   | FGD4    |
| 12 | 32778581  | T=>C             | 24  | intronic | FGD4    |
| 12 | 32791796  | G=>A             | 20  | intronic | FGD4    |
| 12 | 110226379 | G=>A             | 35  | exonic   | TRPV4   |
| 12 | 110238481 | G=>A             | 10  | exonic   | TRPV4   |
| 12 | 110238487 | A=>G             | 18  | exonic   | TRPV4   |
| 12 | 110240838 | T=>G             | 107 | exonic   | TRPV4   |
| 12 | 110252547 | G=>A             | 5   | exonic   | TRPV4   |
| 12 | 110252569 | C=>A             | 6   | exonic   | TRPV4   |
| 14 | 51054598  | A=>G             | 27  | exonic   | ATL1    |
| 14 | 51057727  | G=>A             | 77  | exonic   | ATL1    |
| 14 | 51062357  | G=>A             | 30  | intronic | ATL1    |
| 14 | 77978621  | A=>C             | 14  | UTR3     | SPTLC2  |
| 14 | 78028803  | A=>G             | 120 | exonic   | SPTLC2  |
| 14 | 92339908  | C=>T             | 19  | intronic | FBLN5   |
| 14 | 92340722  | G=>A             | 26  | intronic | FBLN5   |
| 14 | 92340810  | G=>A             | 7   | intronic | FBLN5   |
| 14 | 92340901  | A=>G             | 18  | intronic | FBLN5   |
| 14 | 92340992  | G=>A             | 20  | intronic | FBLN5   |
| 14 | 92343894  | G=>A             | 11  | exonic   | FBLN5   |
| 14 | 92347680  | A=>G             | 136 | exonic   | FBLN5   |
| 14 | 102446161 | G=>A             | 7   | exonic   | DYNC1H1 |
| 14 | 102463407 | A=>G             | 23  | exonic   | DYNC1H1 |
| 14 | 102482399 | C=>T             | 20  | exonic   | DYNC1H1 |
| 14 | 102493761 | A=>G             | 24  | exonic   | DYNC1H1 |
| 14 | 102504838 | C=>T             | 9   | exonic   | DYNC1H1 |
| 14 | 102508056 | C=>A             | 14  | exonic   | DYNC1H1 |
| 14 | 102514227 | T=>C             | 35  | exonic   | DYNC1H1 |
| 14 | 102515015 | G=>A             | 44  | intronic | DYNC1H1 |
| 14 | 105167744 | G=>A             | 6   | exonic   | INF2    |
| 14 | 105167807 | C=>T             | 76  | exonic   | INF2    |
| 14 | 105173862 | ACCCCACCCCCAC=>A | 28  | exonic   | INF2    |
| 14 | 105174110 | A=>C             | 59  | exonic   | INF2    |
| 14 | 105177351 | CA=>C            | 110 |          | INF2    |
| 14 | 105179194 | T=>C             | 136 | exonic   | INF2    |

|    |           |             |     |          |         |
|----|-----------|-------------|-----|----------|---------|
| 14 | 105180565 | T=>C        | 115 | exonic   | INF2    |
| 14 | 105180652 | C=>T        | 5   | exonic   | INF2    |
| 14 | 105180706 | A=>C        | 85  | exonic   | INF2    |
| 14 | 105180706 | A=>G        | 54  | exonic   | INF2    |
| 14 | 105180785 | C=>T        | 22  | exonic   | INF2    |
| 15 | 34528948  | G=>A        | 78  | exonic   | SLC12A6 |
| 15 | 34542872  | C=>G        | 10  | exonic   | SLC12A6 |
| 15 | 34544468  | C=>T        | 32  | exonic   | SLC12A6 |
| 15 | 34546704  | G=>A        | 6   | exonic   | SLC12A6 |
| 15 | 34551082  | G=>A        | 65  | exonic   | SLC12A6 |
| 16 | 11647492  | T=>C        | 60  | exonic   | LITAF   |
| 16 | 11647532  | C=>T        | 7   | exonic   | LITAF   |
| 16 | 11680148  | T=>C        | 15  | UTR5     | LITAF   |
| 16 | 70287177  | A=>G        | 140 | exonic   | AARS    |
| 16 | 70303580  | G=>A        | 107 | exonic   | AARS    |
| 16 | 75674252  | TAAAA=>T    | 104 |          |         |
| 16 | 75675609  | T=>C        | 22  | exonic   | KARS    |
| 16 | 81348764  | C=>T        | 7   | exonic   | GAN     |
| 16 | 81398635  | C=>T        | 44  | exonic   | GAN     |
| 17 | 75277611  | A=>C        | 16  | UTR5     | SEPT9   |
| 17 | 75369578  | T=>C        | 99  | UTR5     | SEPT9   |
| 17 | 75398498  | C=>T        | 34  | exonic   | SEPT9   |
| 17 | 75401190  | G=>A        | 79  | exonic   | SEPT9   |
| 17 | 75494705  | A=>G        | 58  | exonic   | SEPT9   |
| 17 | 75494746  | A=>G        | 42  | UTR3     | SEPT9   |
| 17 | 75495065  | T=>C        | 86  | UTR3     | SEPT9   |
| 17 | 75495397  | T=>C        | 90  | UTR3     | SEPT9   |
| 17 | 75495523  | A=>G        | 7   | UTR3     | SEPT9   |
| 18 | 77441442  | C=>A        | 30  | UTR5     | CTDP1   |
| 18 | 77470834  | C=>T        | 57  | intronic | CTDP1   |
| 18 | 77473086  | G=>A        | 44  | exonic   | CTDP1   |
| 18 | 77473127  | C=>T        | 47  | exonic   | CTDP1   |
| 18 | 77474921  | G=>A        | 39  | exonic   | CTDP1   |
| 18 | 77475455  | G=>A        | 17  | exonic   | CTDP1   |
| 18 | 77478011  | C=>T        | 16  | exonic   | CTDP1   |
| 18 | 77513721  | T=>C        | 144 | exonic   | CTDP1   |
| 19 | 10265312  | T=>C        | 125 | exonic   | DNMT1   |
| 19 | 10265593  | G=>T        | 26  | exonic   | DNMT1   |
| 19 | 10267077  | T=>C        | 85  | exonic   | DNMT1   |
| 19 | 10270741  | TGGGGGAA=>T | 9   |          |         |
| 19 | 10270746  | GA=>G       | 101 | intronic | DNMT1   |
| 19 | 10273372  | T=>C        | 11  | exonic   | DNMT1   |
| 19 | 10904480  | C=>T        | 5   | exonic   | DNM2    |
| 19 | 10908143  | T=>A        | 35  | exonic   | DNM2    |
| 19 | 10939792  | T=>C        | 14  | exonic   | DNM2    |

|    |          |         |     |          |       |
|----|----------|---------|-----|----------|-------|
| 19 | 40900492 | A=>C    | 6   | exonic   | PRX   |
| 19 | 40900865 | C=>T    | 129 | exonic   | PRX   |
| 19 | 40901011 | G=>C    | 39  | exonic   | PRX   |
| 19 | 40901496 | T=>C    | 79  | exonic   | PRX   |
| 19 | 40901604 | A=>G    | 60  | exonic   | PRX   |
| 19 | 40901614 | A=>G    | 77  | exonic   | PRX   |
| 19 | 40902681 | C=>T    | 14  | exonic   | PRX   |
| 19 | 40903528 | G=>A    | 7   | exonic   | PRX   |
| 19 | 40904602 | G=>A    | 40  | exonic   | PRX   |
| 19 | 50339737 | G=>A    | 5   | intronic | MED25 |
| 19 | 50713713 | C=>A    | 17  | exonic   | MYH14 |
| 19 | 50720940 | T=>C    | 5   | exonic   | MYH14 |
| 19 | 50726570 | G=>A    | 97  | exonic   | MYH14 |
| 19 | 50747533 | T=>C    | 6   | exonic   | MYH14 |
| 19 | 50752897 | G=>A    | 14  | intronic | MYH14 |
| 19 | 50753870 | C=>T    | 11  | exonic   | MYH14 |
| 19 | 50760716 | C=>G    | 93  | exonic   | MYH14 |
| 19 | 50762418 | A=>G    | 117 | exonic   | MYH14 |
| 19 | 50771409 | A=>C    | 29  | intronic | MYH14 |
| 19 | 50771432 | C=>T    | 6   | exonic   | MYH14 |
| 19 | 50771609 | G=>A    | 90  | exonic   | MYH14 |
| 19 | 50779469 | C=>T    | 42  | intronic | MYH14 |
| 19 | 50780082 | C=>A    | 5   | exonic   | MYH14 |
| 19 | 50792684 | C=>T    | 5   | intronic | MYH14 |
| 19 | 50792808 | T=>A    | 14  | exonic   | MYH14 |
| 19 | 50796905 | G=>A    | 50  | exonic   | MYH14 |
| 22 | 38369976 | A=>G    | 120 | exonic   | SOX10 |
| 22 | 38379774 | G=>A    | 15  | exonic   | SOX10 |
| 22 | 50885775 | A=>G    | 51  | exonic   | SBF1  |
| 22 | 50894987 | G=>A    | 7   | exonic   | SBF1  |
| 22 | 50895020 | C=>T    | 22  | exonic   | SBF1  |
| 22 | 50898026 | G=>A    | 13  | exonic   | SBF1  |
| 22 | 50901009 | C=>T    | 10  | exonic   | SBF1  |
| 22 | 50902751 | C=>T    | 12  | intronic | SBF1  |
| 22 | 50913394 | CGCG=>C | 30  |          |       |
| 23 | 70443792 | C=>T    | 7   | exonic   | GJB1  |
| 23 | 77298857 | G=>A    | 67  | exonic   | ATP7A |
